# Supplementary material for: The HDAC and PI3K dual inhibitor CUDC-907 synergistically enhances the antileukemic activity of venetoclax in preclinical models of acute myeloid leukemia
Source: PubMed Central journal article supplement — Haematologica. 2020 Mar 12;106(5):1262–77. doi: 10.3324/haematol.2019.233445 (PMC8094102; doi:10.3324/haematol.2019.233445), 2020-03-12
Supplement: 2019_233445-DisclosuresContributions.pdf [file 2019_233445-DisclosuresContributions.pdf]

Haematologica  
HAEMATOL/2019/233445  
Version 5

The HDAC and PI3K dual inhibitor CUDC-907 synergistically enhances the antileukemic activity of venetoclax in preclinical models of acute myeloid leukemia

Xinyu Li, Yongwei Su, Katie Hege, Gerard Madlambayan, Holly Edwards, Tristan Knight, Lisa Polin, Juiwanna Kushner, Sijana H. Dzinic, Kathryn White, Jay Yang, Regan Miller, Guan Wang, Lijing Zhao, Yue Wang, Hai Lin, Jeffrey W. Taub, and Yubin Ge

Disclosures: none

Contributions: XL, YS, KH, GM, RM, and GW performed the in vitro studies. LP, JK, SHD, and KW performed the in vivo mouse studies. LP, JY, GW, LZ, YW, HL, JWT, and YG participated in the design and coordination of the study. XL, YS, KH, GM, HE, TK, LP, JK, SHD, KW, JY, RM, LZ, YW, HL, JWT, and YG participated in the data analysis and interpretation. KH, GM, HE, TK, and YG helped to draft the manuscript. All authors read and approved the final manuscript.
