# Supplementary material for: The HDAC and PI3K dual inhibitor CUDC-907 synergistically enhances the antileukemic activity of venetoclax in preclinical models of acute myeloid leukemia
Source: PubMed Central journal article supplement — Haematologica. 2020 Mar 12;106(5):1262–77. doi: 10.3324/haematol.2019.233445 (PMC8094102; doi:10.3324/haematol.2019.233445), 2020-03-12
Supplement: 2019_233445_LI_SUPPL.pdf [file 2019_233445_LI_SUPPL.pdf]

# The HDAC and PI3K dual inhibitor CUDC-907 synergistically enhances the antileukemic activity of venetoclax in preclinical models of acute myeloid leukemia

Xinyu Li,<sup>1</sup> Yongwei Su,<sup>1</sup> Katie Hege,<sup>2</sup> Gerard Madlambayan,<sup>3</sup> Holly Edwards,<sup>4,5</sup> Tristan Knight,<sup>6,7</sup> Lisa Polin,<sup>4,5</sup> Juiwana Kushner,<sup>4</sup> Sijana H. Dzinic,<sup>4,5</sup> Kathryn White,<sup>4</sup> Jay Yang,<sup>4</sup> Regan Miller,<sup>3</sup> Guan Wang,<sup>1</sup> Lijing Zhao,<sup>8</sup> Yue Wang,<sup>9</sup> Hai Lin,<sup>10</sup> Jeffrey W. Taub<sup>6,7</sup> and Yubin Ge<sup>4,5,7</sup>

<sup>1</sup>National Engineering Laboratory for AIDS Vaccine, Key Laboratory for Molecular Enzymology and Engineering, The Ministry of Education, School of Life Sciences, Jilin University, Changchun, P. R. China; <sup>2</sup>Cancer Biology Graduate Program, Wayne State University School of Medicine, Detroit, MI, USA; <sup>3</sup>Department of Biological Sciences, Oakland University, Rochester, MI, USA; <sup>4</sup>Department of Oncology, Wayne State University School of Medicine, Detroit, MI, USA; <sup>5</sup>Molecular Therapeutics Program, Barbara Ann Karmanos Cancer Institute, Wayne State University School of Medicine, Detroit, MI, USA; <sup>6</sup>Division of Pediatric Hematology/Oncology, Department of Pediatrics, Children's Hospital of Michigan, Detroit, MI, USA; <sup>7</sup>Department of Pediatrics, Wayne State University School of Medicine, Detroit, MI, USA; <sup>8</sup>Department of Rehabilitation, School of Nursing, Jilin University, Changchun, P.R. China; <sup>9</sup>Department of Pediatric Hematology and Oncology, The First Hospital of Jilin University, Changchun, P.R. China and <sup>10</sup>Department of Hematology and Oncology, The First Hospital of Jilin University, Changchun, P.R. China

©2021 Ferrata Storti Foundation. This is an open-access paper. doi:10.3324/haematol.2019.233445

Received: July 25, 2019.

Accepted: March 11, 2020.

Pre-published: March 12, 2020.

Correspondence: YUBIN GE - [gey@karmanos.org](mailto:gey@karmanos.org)

---

## **The HDAC and PI3K dual inhibitor CUDC-907 synergistically enhances the antileukemic activity of venetoclax in preclinical models of acute myeloid leukemia**

Xinyu Li<sup>1</sup>, Yongwei Su<sup>1</sup>, Katie Hege<sup>2</sup>, Gerard Madlambayan<sup>3</sup>, Holly Edwards<sup>4,5</sup>, Tristan Knight<sup>6,7</sup>, Lisa Polin<sup>4,5</sup>, Juiwanna Kushner<sup>4</sup>, Sijana H. Dzinic<sup>4,5</sup>, Kathryn White<sup>4</sup>, Jay Yang<sup>4</sup>, Regan Miller<sup>3</sup>, Guan Wang<sup>1</sup>, Lijing Zhao<sup>8</sup>, Yue Wang<sup>9</sup>, Hai Lin<sup>10</sup>, Jeffrey W. Taub<sup>6,7</sup>, and Yubin Ge<sup>4,5,7</sup>

<sup>1</sup>National Engineering Laboratory for AIDS Vaccine, Key Laboratory for Molecular Enzymology and Engineering, the Ministry of Education, School of Life Sciences, Jilin University, Changchun, P. R. China

<sup>2</sup>Cancer Biology Graduate Program, Wayne State University School of Medicine, Detroit, MI, USA

<sup>3</sup>Department of Biological Sciences, Oakland University, Rochester, MI, USA.

<sup>4</sup>Department of Oncology, Wayne State University School of Medicine, Detroit, MI, USA

<sup>5</sup>Molecular Therapeutics Program, Barbara Ann Karmanos Cancer Institute, Wayne State University School of Medicine, Detroit, MI, USA

<sup>6</sup>Division of Pediatric Hematology/Oncology, Department of Pediatrics, Children's Hospital of Michigan, Detroit, MI, USA

<sup>7</sup>Department of Pediatrics, Wayne State University School of Medicine, Detroit, MI, USA

<sup>8</sup>Department of Rehabilitation, School of Nursing, Jilin University, Changchun, P.R. China

<sup>9</sup>Department of Pediatric Hematology and Oncology, The First Hospital of Jilin University, Changchun, P.R. China

<sup>10</sup>Department of Hematology and Oncology, The First Hospital of Jilin University, Changchun, P.R. China

### **Address correspondence and reprint requests:**

Yubin Ge, Ph.D.

Department of Oncology

Wayne State University School of Medicine

421 E. Canfield, Detroit, Michigan 48201, USA

Tel: (313) 578-4285

Email: [gey@karmanos.org](mailto:gey@karmanos.org)

## **METHODS**

### ***Drugs***

CUDC-907, venetoclax, hydroxyurea (HU), MK-1775, MG132, daunorubicin and 10058-F4 were purchased from Selleck Chemicals (Houston, TX, USA).

### ***Cell culture***

MV4-11, THP-1, and U937 cell lines were purchased from the American Type Culture Collection (2006, 2014, 2002, respectively; Manassas, VA, USA). OCI-AML3 was purchased from the German Collection of Microorganisms and Cell Cultures in 2011 (DSMZ, Braunschweig, Germany). CTS was a gift from Dr. A Fuse from the National Institute of Infectious Diseases, Tokyo, Japan (2004). MOLM-13 was purchased from AddexBio (2012; San Diego, CA, USA). HS-5 was purchased from ATCC. The cell lines were authenticated in 2017 at the Genomics Core at Karmanos Cancer Institute using the PowerPlex® 16 System from Promega (Madison, WI, USA). Mycoplasma testing was performed on a monthly basis using the PCR method<sup>1</sup>. AML cell lines were cultured as previously described.<sup>2,3</sup>

Diagnostic blast samples were purified by standard Ficoll-Hypaque density centrifugation, then cultured in RPMI 1640/20% fetal bovine serum (Thermo Fisher Inc., Rockford, IL, USA) supplemented with ITS solution (Sigma-Aldrich, St. Louis, MO, USA) and 20% supernatant of the 5637 bladder cancer cell line (as a source of granulocyte-macrophage colony-stimulating factor).<sup>4</sup> Normal bone marrow mononuclear cells (BMMNCs) were purchased from Lonza (Walkersville, MD, USA).

### ***Annexin V/PI staining***

AML cells were treated with CUDC-907, venetoclax, HU, MK-1775, MG132, 10058-F4, or a combination for up to 24 h and then underwent Annexin V-fluorescein isothiocyanate

(FITC)/propidium iodide (PI) staining (Beckman Coulter; Brea, CA, USA). Samples were analyzed by flow cytometry, as previously described.<sup>5, 6</sup> All experiments utilizing the AML cell lines were performed three times in triplicate independently, and experiments using primary patient samples were performed once in triplicate due to limited sample. Patient samples were selected based on availability of adequate sample for the assay. Apoptotic events are displayed as mean percentage of Annexin V positive/PI negative (early apoptotic) and Annexin V positive/PI positive (late apoptotic and/or dead) cells  $\pm$  the standard error from one representative experiment. Combination index values (CI) were calculated using CompuSyn software (Composyn Inc. Paramus, NJ, USA).  $CI < 1$ ,  $CI = 1$ ,  $CI > 1$  indicate synergistic, additive, and antagonistic effects, respectively.

#### ***HS-5 co-culture***

AML cells from freshly isolated primary patient samples (n=3) were seeded in the absence or presence of the human bone marrow stromal HS-5 cells (1:1 ratio) for 24 h in RPMI 1640/20% fetal bovine serum (Thermo Fisher Inc.) supplemented with ITS solution (Sigma-Aldrich) and 20% supernatant of the 5637 bladder cancer cell line (as a source of granulocyte-macrophage colony-stimulating factor).<sup>4</sup> The cells were then treated with CUDC-907, venetoclax, or in combination for 24 h. Cells were trypsinized, stained with CD45 (to distinguish AML cells from HS-5 cells), CD34, and Annexin V-FITC and analyzed by flow cytometry. This experiment was performed once in triplicate due to limited sample.

#### ***Western blot analysis***

AML cells were lysed by sonication in 10 mM Tris-Cl, pH 7.0, containing 1% SDS, protease inhibitors, and phosphatase inhibitors (Roche Diagnostics, Indianapolis, IN, USA). Whole cell lysates were subjected to SDS-polyacrylamide gel electrophoresis, electrophoretically

transferred onto polyvinylidene difluoride (PVDF) membranes (Thermo Fisher Inc., Rockford, IL, USA) and immunoblotted with antibodies. Immunoreactive proteins were visualized using the Odyssey Infrared Imaging System (Li-Cor, Lincoln, NE, USA), as described by the manufacturer. For cell lines, three independent experiments were performed. Due to limited number of cells obtained from primary patient samples, Western blots of patient samples were from one independent experiment. Patient samples were selected based on availability of adequate sample for the analysis. Anti-PARP, -Mcl-1, -Bcl-2, - $\beta$ -actin, -CHK1 (Proteintech, Chicago, IL, USA), -Bim, -p-Mcl-1 (T163), -Wee1, -RPA32, -cleaved (cf) caspase 3, -c-Myc (Cell Signaling Technologies, Danvers, MA, USA), -RRM1, -H4 (Abcam, Cambridge, MA, USA), and - $\gamma$ H2AX (Millipore, Billerica, MA, USA) antibodies were used for Western blot analysis.

#### ***shRNA knockdown of Bim and overexpression of Mcl-1 and c-Myc***

Lentivirus production and transduction were carried out as previously described.<sup>7</sup> The pMD-VSV-G and delta 8.2 plasmids were gifts from Dr. Dong at Tulane University. Bim and non-target control (NTC) shRNA lentiviral vectors were purchased from Sigma-Aldrich. Red fluorescent protein (RFP), c-Myc, and Mcl-1 cDNA constructs were purchased from Thermo Fisher Scientific Biosciences (Lafayette, CO, USA).

#### ***Immunoprecipitation***

AML cells were treated with CUDC-907 and venetoclax, alone or in combination, for 24 hours and then lysed using 1% CHAPS, 5 mM MgCl<sub>2</sub>, 150 mM NaCl, 1 mM EGTA, 1 mM EDTA, 20 mM Tris, and 0.05% Tween-20 in the presence of protease inhibitors (Roche Diagnostics). Immunoprecipitation of Bim and Mcl-1 were performed using 2  $\mu$ g of anti-Bim (2819, Cell Signaling Technologies) or anti-Mcl-1 (16225-1-AP, Proteintech), 1 mg of protein lysate, and

Protein A agarose beads (Roche Diagnostics) as previously described.<sup>8</sup> Proteins were eluted using 50 mM glycine, pH 2.0, and then analyzed by Western blotting.

### ***Alkaline comet assay***

Following treatment with CUDC-907, venetoclax, HU, MK-1775, 10058-F4, or in combination for up to 28 hours, AML cells were subjected to alkaline comet assays, as previously described<sup>7</sup>. Using SYBR Gold (Life Technologies, Grand Island, NY, USA), slides were stained and then subsequently imaged using an Olympus BX-40 microscope equipped with a DP72 microscope camera and Olympus CellSens Dimension software (Olympus America Inc., Center Valley, PA, USA). Approximately 50 comets were scored per gel, using CometScore (TriTek Corp, Sumerduck, VA, USA). Median percentage of DNA in the tail was calculated and graphed as mean  $\pm$  the standard error. Primary patient samples were chosen for this assay based on adequate sample availability.

### ***Real-time PCR***

Total RNA was extracted using TRIzol (Life Technologies), cDNAs were prepared from 2  $\mu$ g of total RNA using random hexamer primers and a RT-PCR kit (Thermo Fisher Scientific), and then purified using the QIAquick PCR Purification Kit (Qiagen, Germantown, MD, USA), as described previously.<sup>2, 6, 9</sup> *Mcl-1* (Hs01050896\_m1), *Bim* (Hs00708019\_s1), *CHK1* (Hs00967506\_m1), and *Wee1* (Hs01119384\_g1) transcripts were quantitated using TaqMan probes (Thermo Fisher Scientific) and a LightCycler 480 real-time PCR machine (Roche Diagnostics), based on the manufacturer's instructions. *RRM1* transcripts were quantified using forward (5'-ACTAAGCACCTGACTATGCTATCC-3') and reverse (5'-CTTCATCACATCACTGAACACTTT-3') primers and SYBR green, and the above-mentioned real-time PCR machine. *c-Myc* transcripts were quantified using forward (5'-

GTGGTCTTCCCCTACCCTCT-3') and reverse (5'-CGAGGAGAGCAGAGAATCCG-3') primers. Real-time PCR results are expressed as means from three independent experiments and normalized to GAPDH transcripts measured by either TaqMan probe (Hs02786624\_g1) or forward (5'-AGCCACATCGCTCAGACA-3') and reverse (5'-GCCCAATACGACCAAATCC-3') primers and SYBR green. Fold changes were calculated using the comparative Ct method.<sup>10</sup>

### ***Chromatin fractionation***

Cells were treated with CUDC-907 and venetoclax, alone or in combination, for 16 or 24 hours. Chromatin fractionation was carried out as described previously.<sup>11</sup> These experiments were repeated three independent times.

### **References**

1. Uphoff CC, Drexler HG. Detection of mycoplasma contaminations. *Methods Mol Biol.* 2005;**290**:13-23.
2. Niu X, Wang G, Wang Y, et al. Acute myeloid leukemia cells harboring MLL fusion genes or with the acute promyelocytic leukemia phenotype are sensitive to the Bcl-2-selective inhibitor ABT-199. *Leukemia.* 2014;**28**(7):1557-1560.
3. Su Y, Li X, Ma J, et al. Targeting PI3K, mTOR, ERK, and Bcl-2 signaling network shows superior antileukemic activity against AML ex vivo. *Biochem Pharmacol.* 2018;**148**:13-26.
4. Quentmeier H, Zaborski M, Drexler HG. The human bladder carcinoma cell line 5637 constitutively secretes functional cytokines. *Leuk Res.* 1997;**21**(4):343-350.
5. Xie C, Edwards H, Xu X, et al. Mechanisms of synergistic antileukemic interactions between valproic acid and cytarabine in pediatric acute myeloid leukemia. *Clin Cancer Res.* 2010;**16**(22):5499-5510.

6. Edwards H, Xie C, LaFiura KM, et al. RUNX1 regulates phosphoinositide 3-kinase/AKT pathway: role in chemotherapy sensitivity in acute megakaryocytic leukemia. *Blood*. 2009;**114**(13):2744-2752.
7. Xie C, Drenberg C, Edwards H, et al. Panobinostat enhances cytarabine and daunorubicin sensitivities in AML cells through suppressing the expression of BRCA1, CHK1, and Rad51. *PLoS One*. 2013;**8**(11):e79106.
8. Xie C, Edwards H, Lograsso SB, et al. Valproic acid synergistically enhances the cytotoxicity of clofarabine in pediatric acute myeloid leukemia cells. *Pediatr Blood Cancer*. 2012;**59**(7):1245-1251.
9. Xu X, Xie C, Edwards H, Zhou H, Buck SA, Ge Y. Inhibition of histone deacetylases 1 and 6 enhances cytarabine-induced apoptosis in pediatric acute myeloid leukemia cells. *PLoS One*. 2011;**6**(2):e17138.
10. Livak KJ, Schmittgen TD. Analysis of relative gene expression data using real-time quantitative PCR and the 2(-Delta Delta C(T)) Method. *Methods*. 2001;**25**(4):402-408.
11. Ma J, Li X, Su Y, et al. Mechanisms responsible for the synergistic antileukemic interactions between ATR inhibition and cytarabine in acute myeloid leukemia cells. *Sci Rep*. 2017;**7**:41950.



**Table S1. Patient characteristics of the primary AML patient samples used in this study**

| Patient | Gender | Age (year) | Disease status  | FAB subtype | Cytogenetics              | Blast purity (%) | Gene mutation                      |
|---------|--------|------------|-----------------|-------------|---------------------------|------------------|------------------------------------|
| AML#1   | Female | 74         | Newly diagnosed | M1          | 46, XX                    | 69               |                                    |
| AML#2   | Male   | 48         | Newly diagnosed | M2          | 46, XY                    | 79.5             | FLT-3 ITD                          |
| AML#3   | Male   | 50         | Newly diagnosed | M2          | 46, XY                    | 88.0             |                                    |
| AML#4   | Female | 5          | Newly diagnosed | M4          | NA                        | 49.0             |                                    |
| AML#5   | Female | 13         | Newly diagnosed | M2          | NA                        | 66.0             | NA                                 |
| AML#6   | Male   | 65         | Newly diagnosed | M4          | 46, XY                    | 86.0             | FLT3-ITD, DNMT3A, IDH2             |
| AML#7   | Male   | 27         | Newly diagnosed | M3          | 46, XY, t(15;17)(q22;q21) | 94.0             | FLT3-ITD, PML-RAR $\alpha$         |
| AML#8   | Male   | 46         | Newly diagnosed | M1          | 46, XY                    | 92.0             | CEBPA double mutation              |
| AML#9   | Female | 10         | Newly diagnosed | M5          | 46, XX                    | 97.0             |                                    |
| AML#10  | Female | 60         | Relapsed        | M2          | 46, XX                    | 69.0             | CEBPA double mutation              |
| AML#11  | Male   | 40         | Newly diagnosed | M2          | 46, XY                    | 88.5             | CEBPA double mutation              |
| AML#12  | Female | 51         | Relapsed        | M5          | 46, XX                    | 94               | FLT3-ITD, NPM1, DNMT3A             |
| AML#13  | Male   | 49         | Relapsed        | M2          | 46, XY                    | 79.5             | FLT3-ITD, NPM1                     |
| AML#14  | Male   | 66         | Newly diagnosed | M5          | 46, XY                    | 41               |                                    |
| AML#15  | Male   | 2          | Newly diagnosed | M5          | 50, XY, +8, +11, +14, +19 | 66.4             |                                    |
| AML#16  | Male   | 66         | Newly diagnosed | M2          | 46, XY                    | NA               | CEBPA double mutation              |
| AML#17  | Female | 40         | Newly diagnosed | M4          | 46, XY                    | 53.5             | NPM-1, IDH-1                       |
| AML#18  | Female | 48         | Newly diagnosed | M2          | NA                        | 61               | NA                                 |
| AML#19  | Female | 59         | Newly diagnosed | M2          | 47, XX,+8                 | 60.5             | FLT3-ITD, DNMT3A                   |
| AML#20  | Female | 54         | Newly diagnosed | M2          | 46, XX                    | 58.5             | CEBPA double mutation, IDH2, N-RAS |
| AML#21  | Male   | 68         | Relapsed        | M5          | 46, XY                    | 96.5             | FLT3-ITD, NPM1, DNMT3A             |
| AML#22  | Female | 51         | Newly diagnosed | M4          | NA                        | 94               | NA                                 |
| AML#23  | Female | 42         | Newly diagnosed | M5          | 46, XX                    | 64               | NPM1, DNMT3A, IDH1, FLT3-TKD       |
| AML#24  | Female | 61         | Newly diagnosed | M3          | 46, XX, t(15;17)(q22;q21) | 90.2             | PML-RAR $\alpha$ , ATRX, FLT3-ITD  |
| AML#25  | Female | 33         | Newly diagnosed | M4/M5       | 46, XX                    | 87               | NPM1                               |
| AML#26  | Male   | 56         | Relapsed        | M4/M5       | 46, XY                    | 88               | NA                                 |
| AML#27  | Male   | 9          | Newly diagnosed | M4/M5       | 46, XY                    | 83.5             | CEBPA, FLT3-TKD, WT1               |

NA: not available

**Table S2. Characteristics of the AML cell lines used in this study**

| Cell line | Gender | Age (year) | Disease Statue | FAB subtype | Cytogenetics          | Gene fusion/mutation | Doubling time | CUDC-907 EC50 (nM) |
|-----------|--------|------------|----------------|-------------|-----------------------|----------------------|---------------|--------------------|
| MOLM-13   | Male   | 20         | At relapse     | M5          | Ins(11;9)(q23;p22p23) | FLT3-ITD, MLL-AF9    | 24            | 42.4               |
| U937      | Male   | 37         | Refractory     | M5          | t(10;11)(p13;q14)     | CALM-AF10            | 24            | 74.0               |
| CTS       | Female | 13         | At relapse     | M1          | t(6;11)(q27;q23)      | MLL-AF6              | 72            | 40.4               |
| MV4-11    | Male   | 10         | At relapse     | M5          | t(4;11)(q21;q23)      | FLT3-ITD, MLL-AF4    | 32            | 24.0               |
| OCI-AML3  | Male   | 57         | At relapse     | M5          |                       | NPM1                 | 35-40         | 44.8               |
| THP-1     | Male   | 1          | At relapse     | M5          | t(9;11)(p21;q23)      | MLL-AF9              | 35-40         | 323.9              |

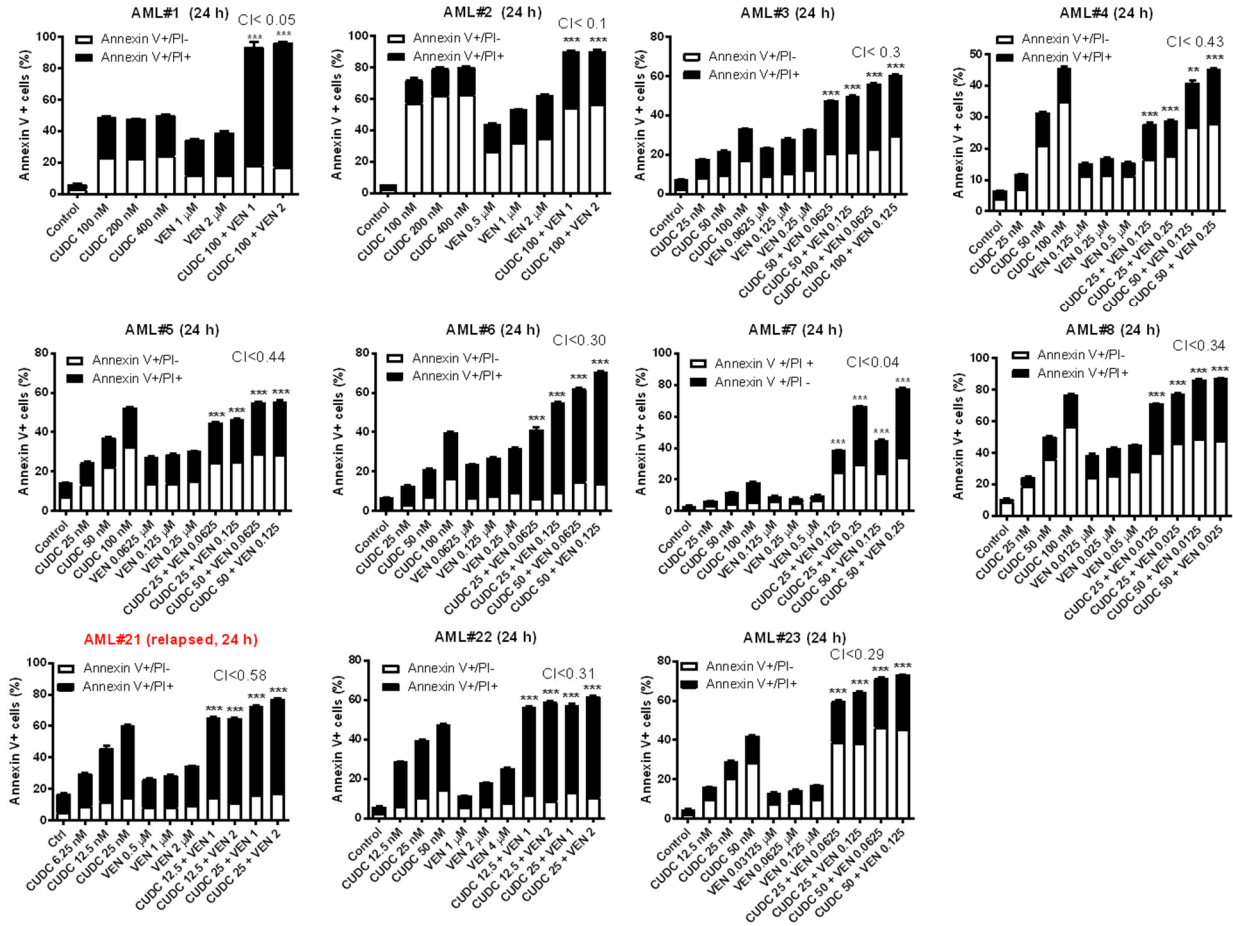

**Figure S1:** Primary AML patient samples were treated with vehicle control, venetoclax (VEN), CUDC-907 (CUDC), or in combination for 24 h. Flow cytometry analysis of Annexin-V-FITC/PI staining was performed. Results are shown as mean percent Annexin V+ cells  $\pm$  SEM. Combination index (CI) values were calculated using CompuSyn software. \*\* indicates  $p < 0.01$  and \*\*\* indicates  $p < 0.001$  compared to single drug treatments.

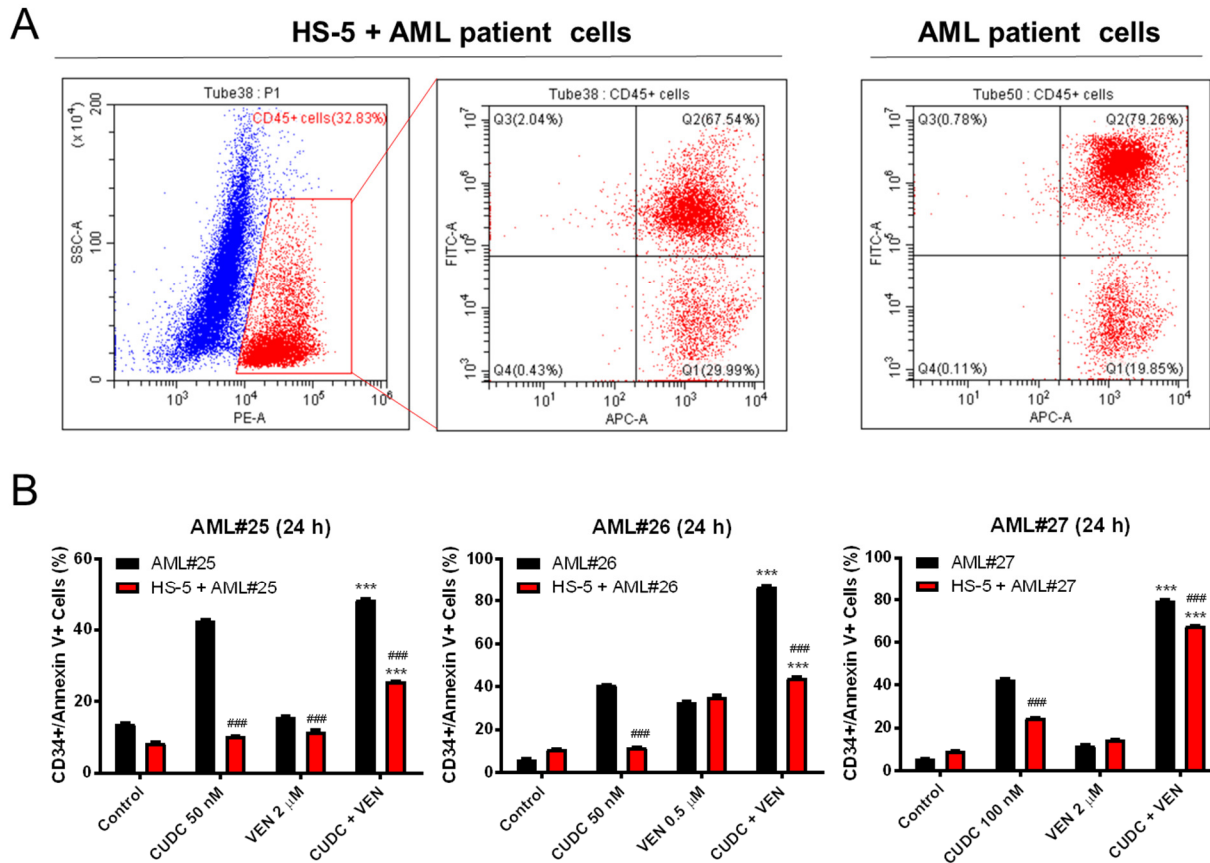

**Figure S2:** (A&B) Primary AML patient samples were treated with vehicle control, venetoclax (VEN), CUDC-907 (CUDC), or in combination for 24 h in the absence or presence of human bone marrow stromal HS-5 cells. The cells were harvested and then subjected to flow cytometry analysis. Within the CD45+ cell population, CD34+ and Annexin V+ cells were determined. The gating strategy is shown in panel A. Results are shown as mean percent CD34+/Annexin V+ cells  $\pm$  SEM. \*\*\*indicates  $p < 0.001$  compared to control, CUDC-907, and venetoclax single drug treatment, for either the patient sample or the patient sample grown in the presence of HS-5. ####indicates  $p < 0.001$  compared to the same drug treatment, in the absence of HS-5 cells.

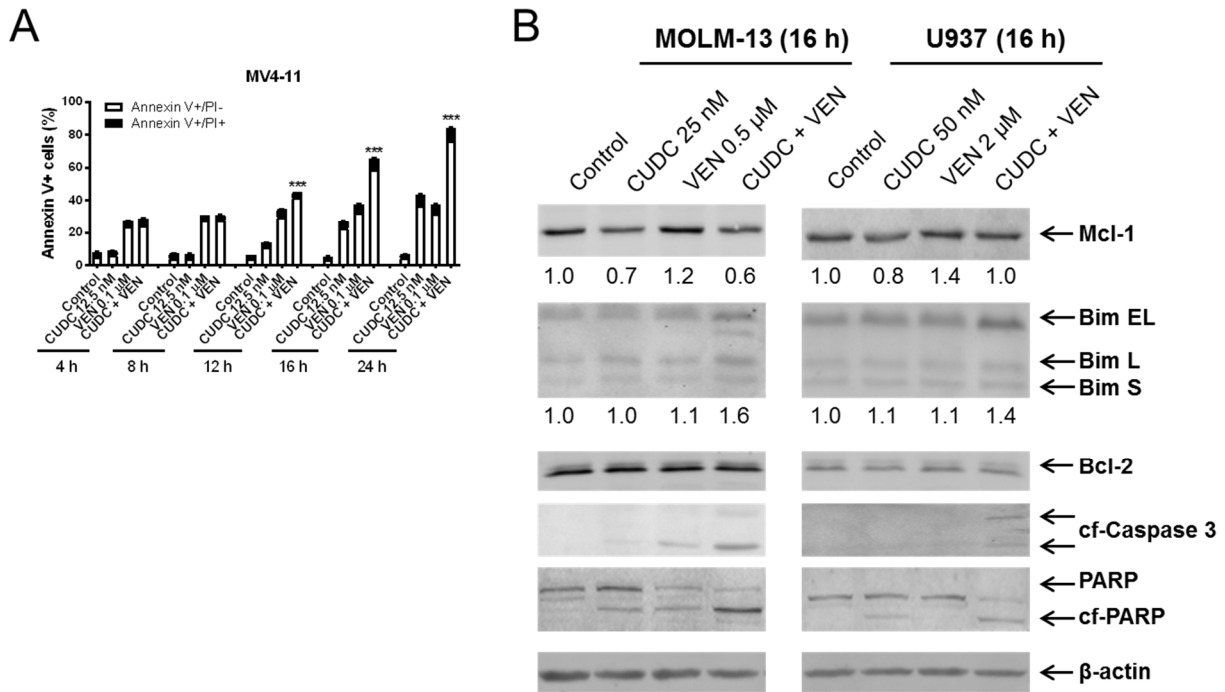

**Figure S3:** (A) MV4-11 cells were treated with vehicle control, venetoclax (VEN), CU9C-907 (CU9C), or in combination for up to 24. Flow cytometry analysis of Annexin-V-FITC/PI staining was performed. Results are shown as mean percent Annexin V+ cells  $\pm$  SEM. \*\*\*indicates  $p < 0.001$  compared to single drug treatments. (B) AML cells were treated with vehicle control, venetoclax, CU9C-907, or in combination for 16 hours, and whole cell lysates were subjected to Western blotting. Representative Western blots are shown. The fold changes for the densitometry measurements, normalized to  $\beta$ -actin and then compared to no drug control, are indicated below the corresponding blot. Bim S, L, and EL indicate Bim short, long, and extra-long isoforms, respectively.

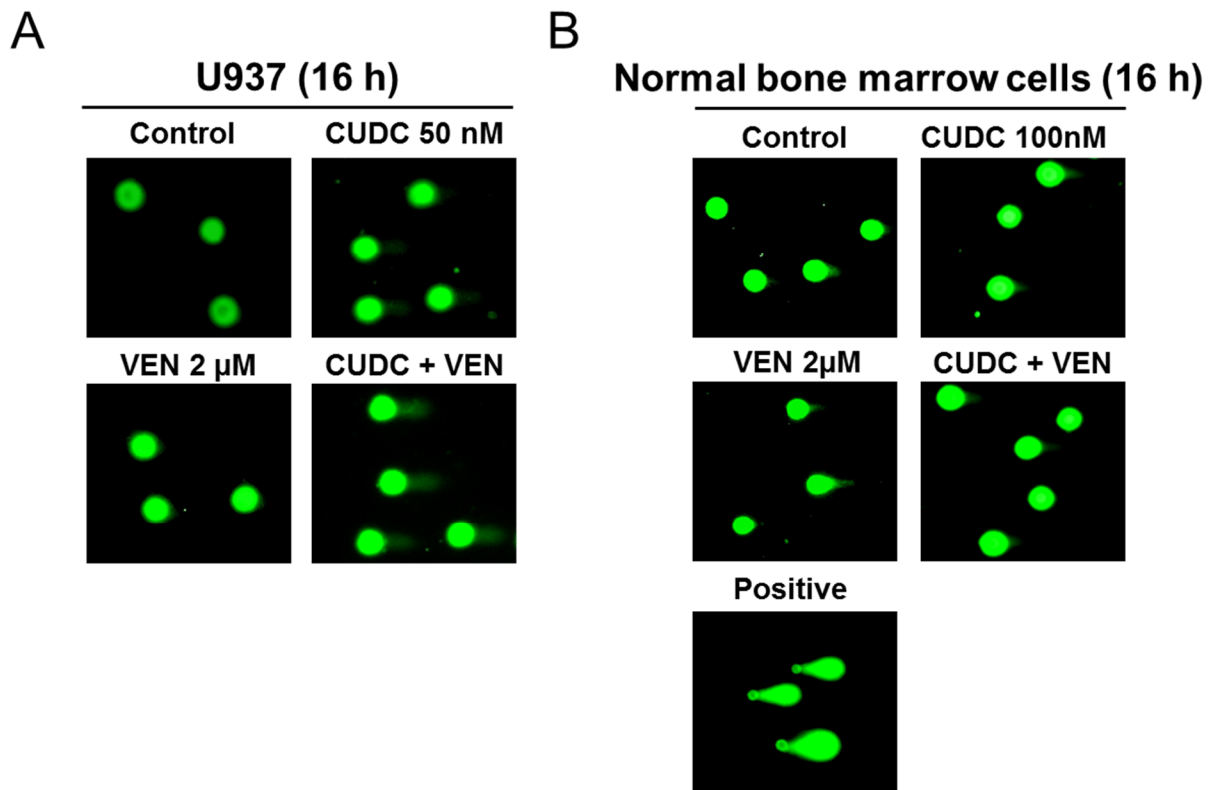

**Figure S4:** AML cells and normal bone marrow cells were treated for 16 hours with vehicle control, venetoclax (VEN), CUDC-907 (CUDC), venetoclax + CUDC-907, or a positive control (20  $\mu$ M daunorubicin for 4 hours), and then subjected to alkaline comet assay analysis. Representative alkaline comet assay images for U937 and normal bone marrow cells are shown.

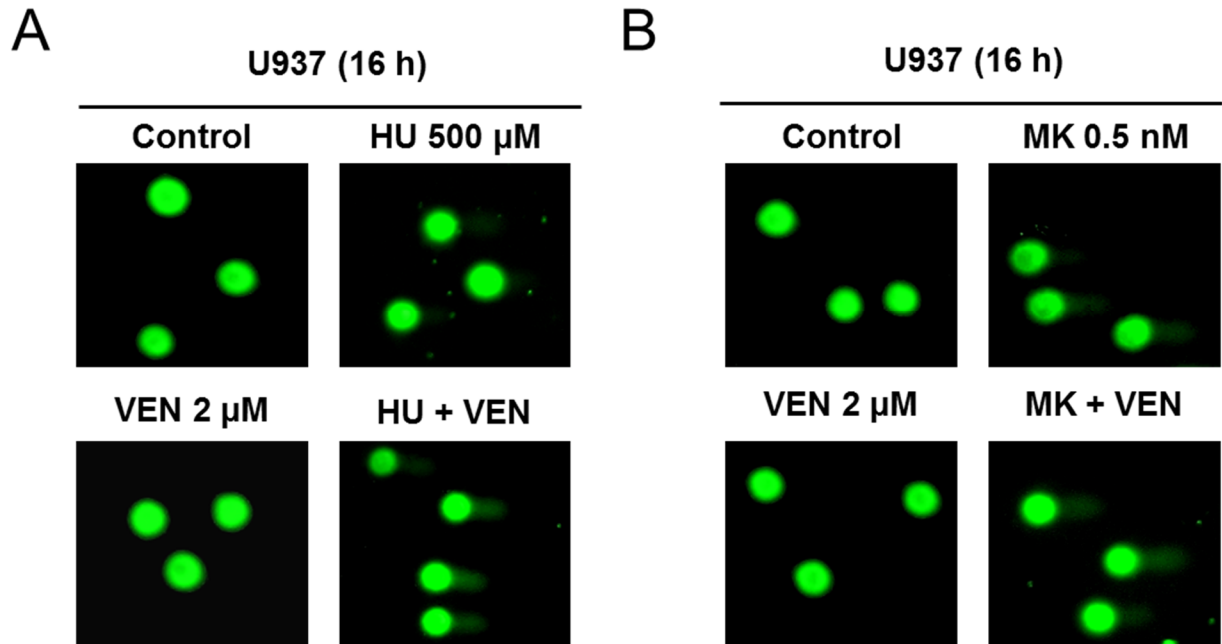

**Figure S5:** U937 cells were treated with venetoclax (VEN) in the presence or absence of MK-1775 (MK) or hydroxyurea (HU) for 16 h, and then subjected to alkaline comet assay analysis. Representative images are shown.

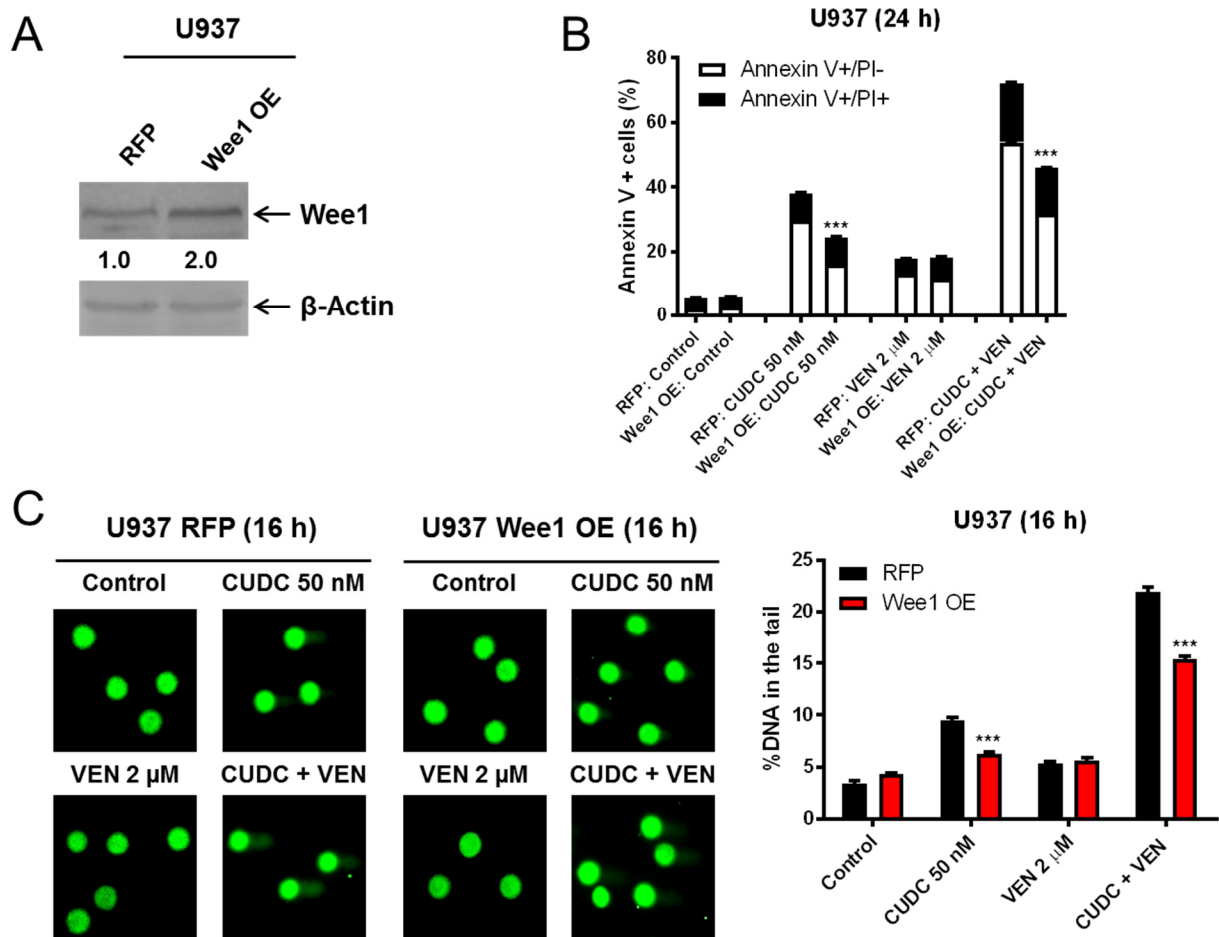

**Figure S6:** U937 cells were infected with Precision LentiORF Wee1 (U937/Wee1) or RFP control (U937/RFP) lentivirus overnight, then washed and incubated for 48 h prior to adding blasticidin to the culture medium. Whole cell lysates of the antibiotic resistant cells were subjected to Western blotting. The fold changes for the Wee1 densitometry measurements, normalized to  $\beta$ -actin and then compared to no drug treatment control, are indicated (panel A). The cells were treated with CUDC-907 (CUDC) or/and venetoclax (VEN) for 24 hours, and then subjected to Annexin V/PI staining and flow cytometry analysis. \*\*\*indicates  $p < 0.001$  (panel B). The antibiotic-resistant cells were treated with CUDC-907 or/and venetoclax for 16 hours and then subjected to alkaline comet assay analysis. Representative images are shown (panel C, left panel). Data are graphed as mean percent DNA in the tail from 3 replicate gels  $\pm$  SEM. \*\*\*indicates  $p < 0.001$  (panel C, right panel).



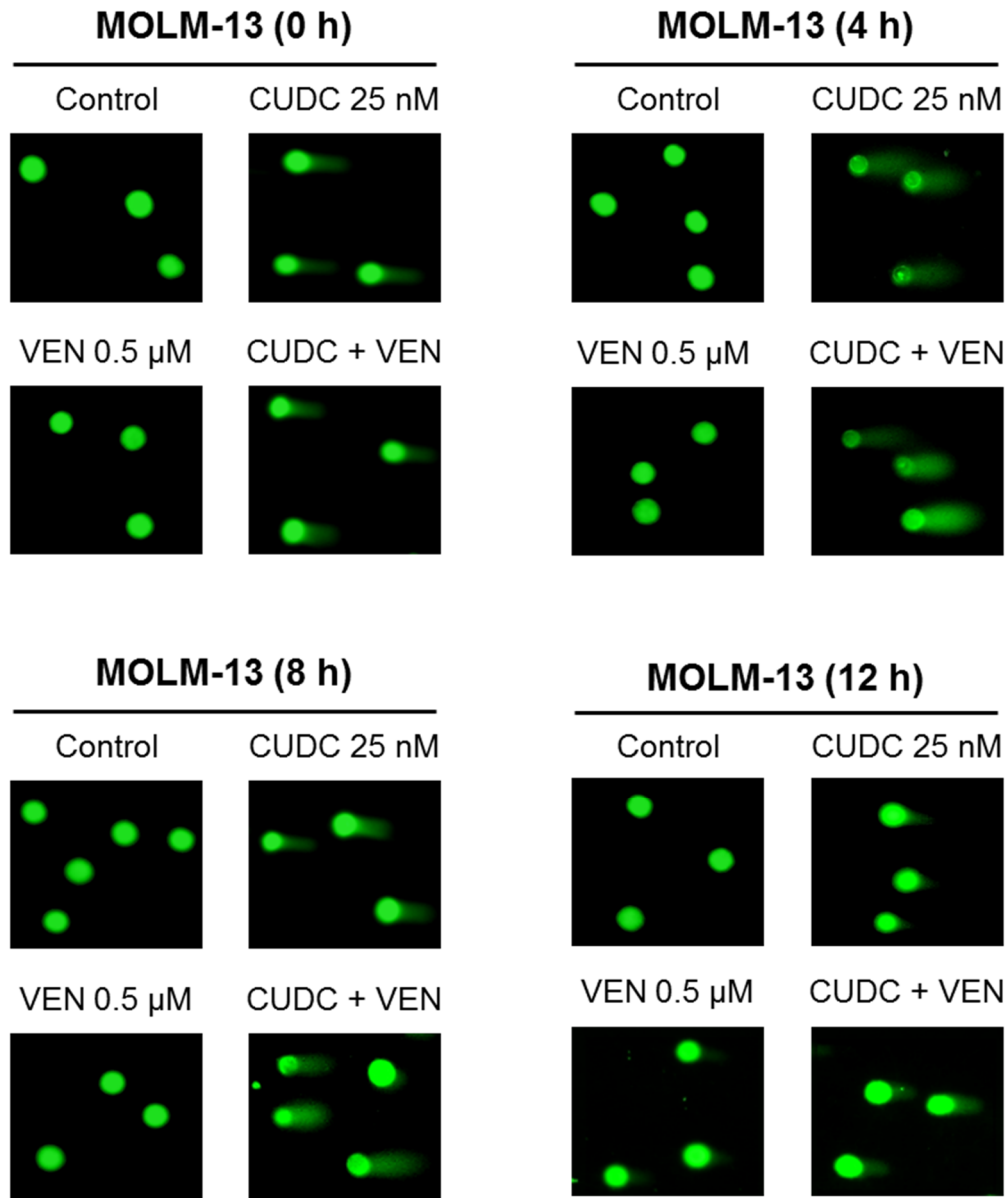

**Figure S7:** MOLM-13 cells were treated with or without 25 nM CUDC-907 (CUDC) for up to 16 hours. The cells were washed with PBS three times and then treated with or without venetoclax (VEN) for up to 12 h. The cells were subjected to alkaline comet assay analysis. Representative images are shown.
